# Supplementary material
Source: Oxford University Press journal article supplement (https://ajot2.silverchair-cdn.com/ajot2/content_public/journal/ajot/issue/65/6_supplement/2/toc.pdf)
Supplement: Supplementary file 1 [file toc.pdf]

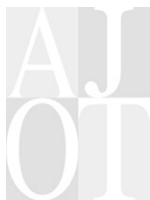

# The American Journal of Occupational Therapy

November/December 2011  
Volume 65, Number 6(Supplement)

## *Occupational Therapy Research Agenda*

### **S4 Occupational Therapy Research Agenda**

## *AOTA Official Documents*

### **S8 Official Documents Available From the American Occupational Therapy Association**

### **S11 The Role of Occupational Therapy in Disaster Preparedness, Response, and Recovery**

### **S26 Complementary and Alternative Medicine**

### **S32 Occupational Therapy Services for Individuals Who Have Experienced Domestic Violence**

### **S46 Occupational Therapy Services in Early Childhood and School-Based Settings**

### **S55 Occupational Therapy Services in Facilitating Work Performance**

### **S65 The Philosophical Base of Occupational Therapy**

### **S66 The Role of Occupational Therapy in End-of-Life Care**

### **S76 AOTA's Societal Statement on Health Disparities**

### **S78 AOTA's Societal Statement on Health Literacy**

## *The Association*

### **S80 Association Policies**

### **S84 2011 AOTA/AOTF Awards and Recognitions Recipients**

### **S85 2011 Representative Assembly Summary of Minutes**

### **S87 91st Annual Business Meeting Minutes**

### **S89 List of Educational Programs in Occupational Therapy**

## *Author Guidelines*

### **S102 Guidelines for Contributors to *AJOT***
